# Supplementary material for: Surface Modification of Polytetrafluoroethylene and Polycaprolactone Promoting Cell-Selective Adhesion and Growth of Valvular Interstitial Cells
Source: MDPI journal article supplement (doi:10.3390/jfb13020070), 2022-06-01

# Supplemental information

Supplementary Figure S1. Gating hierarchy used for sort of eGFP modified VCs and ECs.

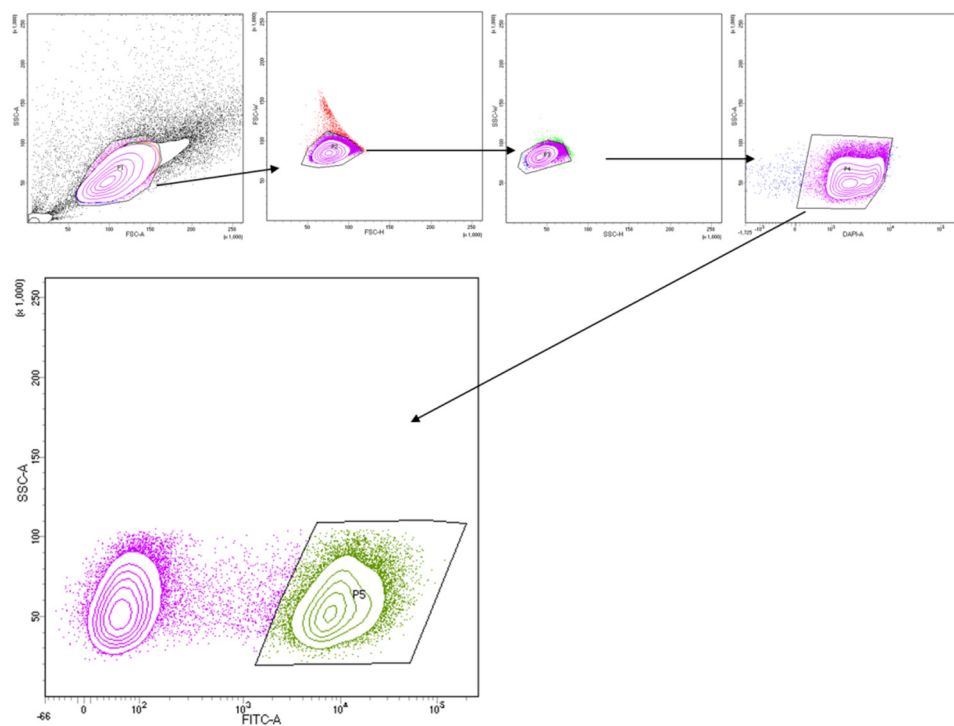

Supplement: s1 [file s1]
